# Supplementary material
Source: publisher site journal article supplement (https://www.dovepress.com/article/338421)
Supplement: Supplementary file 1 [file get_supplementary_file.php]

**Supplementary Table 1** Controlling nutritional status index score: assessment of malnutritional state.16,32

| Parameter | Malnutritional state | | | |
| --- | --- | --- | --- | --- |
| Normal | Mild | Moderate | Serve |
| Albumin (g/dL) [score] | ≥3.50 [0] | 3.00–3.49 [2] | 2.50–2.99 [4] | <2.50 [6] |
| Total lymphocyte count (mg/dL) [score] | ≥1600 [0] | 1200–1599 [1] | 800–1199 [2] | <800 [3] |
| Total cholesterol (mg/dL) [score] | ≥180 [0] | 140–179 [1] | 100–139 [2] | <100 [3] |
| Total score | 0-1 | 0-1 | 0-1 | 0-1 |

**Supplementary Table 2*.*** Univariate Cox regression analysis of overall survival in the training cohort.

| Variables | Univariate analysis | P value |
| --- | --- | --- |
| Hazard ratio (95% CI) |
| Age, years |  |  |
| ≤50 | Reference |  |
| >50 | 1.25 (0.88-1.79) | 0.218 |
| T stage **a** |  |  |
| T1 | Reference |  |
| T2 | 1.99 (1.24-3.19) | 0.004***** |
| T3 | 4.25 (2.15-8.38) | **<** 0.001***** |
| T4 | 5.97 (3.11-11.44) | **<** 0.001***** |
| N stage **a** |  |  |
| N0 | Reference |  |
| N1 | 2.88 (1.61-5.15) | **<** 0.001***** |
| N2 | 7.84 (4.49-13.71) | **<** 0.001***** |
| N3 | 13.22 (7.62-22.93) | **<** 0.001***** |
| Menstrual status | 1.013 (0.996-1.031) | 0.133 |
| Premenopausal | Reference | 0.004***** |
| Menopausal | 1.71 (1.19-2.44) |  |
| Histological type |  |  |
| others | Reference |  |
| Invasive ductal carcinoma | 2.62 (1.28-5.36) | 0.009***** |
| ER status |  |  |
| Negative | Reference |  |
| Positive | 0.60 (0.42-0.87) | 0.007***** |
| PR status |  |  |
| Negative | Reference |  |
| Positive | 0.60 (0.42-0.85) | 0.005***** |
| HER2 status |  |  |
| Negative | Reference |  |
| Positive | 1.66 (1.15-2.39) | 0.007***** |
| Ki-67 index **b** |  |  |
| <30 | Reference |  |
| ≥30 | 2.16 (1.48-3.14) | **<** 0.001***** |
| INPS score |  |  |
| High-INPS | Reference |  |
| Low-INPS | 0.48 (0.33-0.69) | **<** 0.001***** |

**Notes:**

******P* < 0.05.

**a**: Diagnosed based on the AJCC 2010 criteria (seventh edition).

**b**: The Ki-67 index at diagnosis indicates DNA synthetic activity as measured using immunocytochemistry.

**Abbreviations:** IDC, invasive ductal carcinoma; ER, estrogen receptor; PR, progesterone receptor; HER2, human epidermal growth factor receptor 2; INPS, inflammatory-nutritional prognostic scoring.
